# Supplementary material
Source: PubMed Central journal article supplement (PMC6960355)
Supplement: NIHMS1064645-supplement-Supp_info.pdf [file NIHMS1064645-supplement-Supp_info.pdf]

**SI Table 1:** Summary of the sequences obtained from several SELEX experiments done to isolate an ssDNA aptamer for cAMP. Sequences under PreNSE were eluted prior to nonspecific elimination, whereas sequences under PostNSE were eluted after nonspecific elimination. Libraries A-C are DNA libraries obtained from three independent synthesis. Sequences are divided into groups A-E based on multiple sequence alignment of randomized regions. Note that sequences in Group E were predominantly obtained PreNSE, and hence are nonspecific and excluded from further study.

|                        | Library | Solid Support                                                     | Fraction Bound | Group A | Group B | Group C | Group D | Group E | Total |
|------------------------|---------|-------------------------------------------------------------------|----------------|---------|---------|---------|---------|---------|-------|
| <b>SELEX-1 PostNSE</b> | A       | C2'-Biotin-Streptavidin round (1-13)<br>C2'-Agarose round (14-23) | NA             | 11      | 6       | 10      | 0       | 0       | 27    |
| <b>SELEX-2 PostNSE</b> | B       | C2' and C8 agarose                                                | ~ 3%           | 3       | 22      | 0       | 3       | 0       | 28    |
| <b>SELEX-3 PreNSE</b>  |         | C2' and C8 agarose                                                | ~ 35 %         | 1       | 4       | 0       | 0       | 9       | 14    |
| <b>SELEX-3 PostNSE</b> |         |                                                                   | ~1.5 %         | 0       | 12      | 0       | 0       | 1       | 13    |
| <b>SELEX-4 PreNSE</b>  | C       | C2, C2' and C8 agarose                                            | ~ 50 %         | 0       | 1       | 0       | 0       | 16      | 17    |
| <b>SELEX-4 PostNSE</b> |         |                                                                   | ~ 20 %         | 3       | 9       | 0       | 0       | 2       | 14    |
| <b>Total PostNSE</b>   |         |                                                                   |                | 17      | 49      | 10      | 3       | 3       | 82    |

**SI Table 2:** Nucleic acid sequences used in the study

| Name               | Sequence (5'-3')                                                                 | Modification                   |
|--------------------|----------------------------------------------------------------------------------|--------------------------------|
| Full Length        | ATACCAGCTTATTCAATTTCGAGGCGGGTGGGTGGGTTGAAT<br>ATGCGGATCACGCCACAGATAGTAAGTGCAATCT | None                           |
| Apt-A              | ATGCGGATCACGCCACAGATAGTAAGTGCAATCT                                               | None                           |
| Apt-B              | ATACCAGCTTATTCAATTTCGAGGCGGGTGGGTGGGTTGAAT                                       | None                           |
| Apt-C / caDNAapt-1 | ATTCAATTTCGAGGCGGGTGGGTGGGTTGAAT                                                 | None                           |
| Apt-D              | TTCGAGGCGGGTGGGTGGGTTGAAT                                                        | None                           |
| Apt-E              | ATTCAATTTCGAGGCGGGTGGGTGGG                                                       | None                           |
| caDNAptT-1         | ATTCAATTTCGAGGCGGGTGGGTGGGTTGAAT                                                 | TMR at 3' terminus             |
| caDNAptT-2         | ATTCAATTTCGAGGCGGGTGGGTGGGTGAAT                                                  | TMR at red T                   |
| caDNAptT-3         | ATTCAATTTCGAGGCGGGTGGGTGGGTGAAT                                                  | TMR at green T                 |
| FPL                | ATACCAGCTTATTCAATT                                                               | None                           |
| RPL                | AGATTGCACTTACTATCT                                                               | None                           |
| Library            | ATACCAGCTTATTCAATT -N40- GATAGTAAGTGCAATCT                                       | N=A:C:G:T<br>(1.5:1.5:1.0:1.2) |

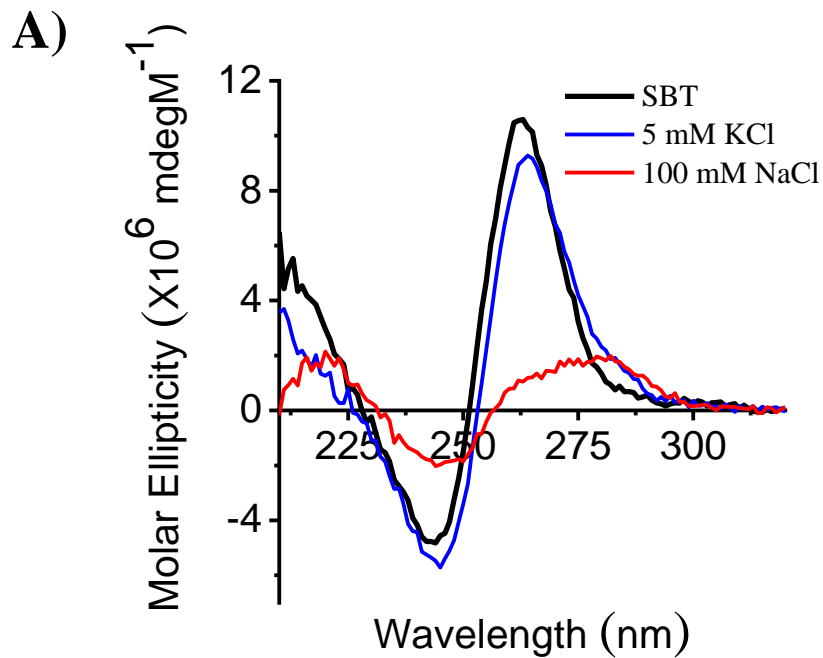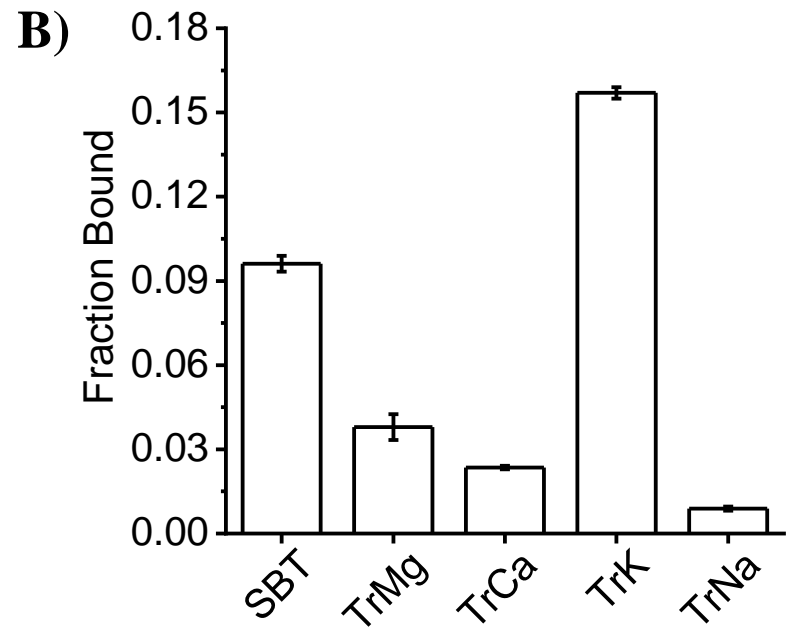

**SI Figure 1:** **a)** CD spectrum of caDNApt-1 in SBT (black) and in solution containing Tris Cl (20 mM, pH 7.5) and 0.2 % Tween 20 and either 5 mM KCl (blue) or 100 mM NaCl (red) **b)** Fraction bound of 5'-<sup>32</sup>P labelled caDNApt-1 on cAMP-agarose beads in SBT and in solutions containing Tris.Cl (20 mM, pH 7.5) and 0.2 % Tween-20 and one of the following: 1mM MgCl<sub>2</sub> (TrMg), 1 mM CaCl<sub>2</sub> (TrCa), 5 mM KCl (TrK) and 100 mM NaCl (TrNa).

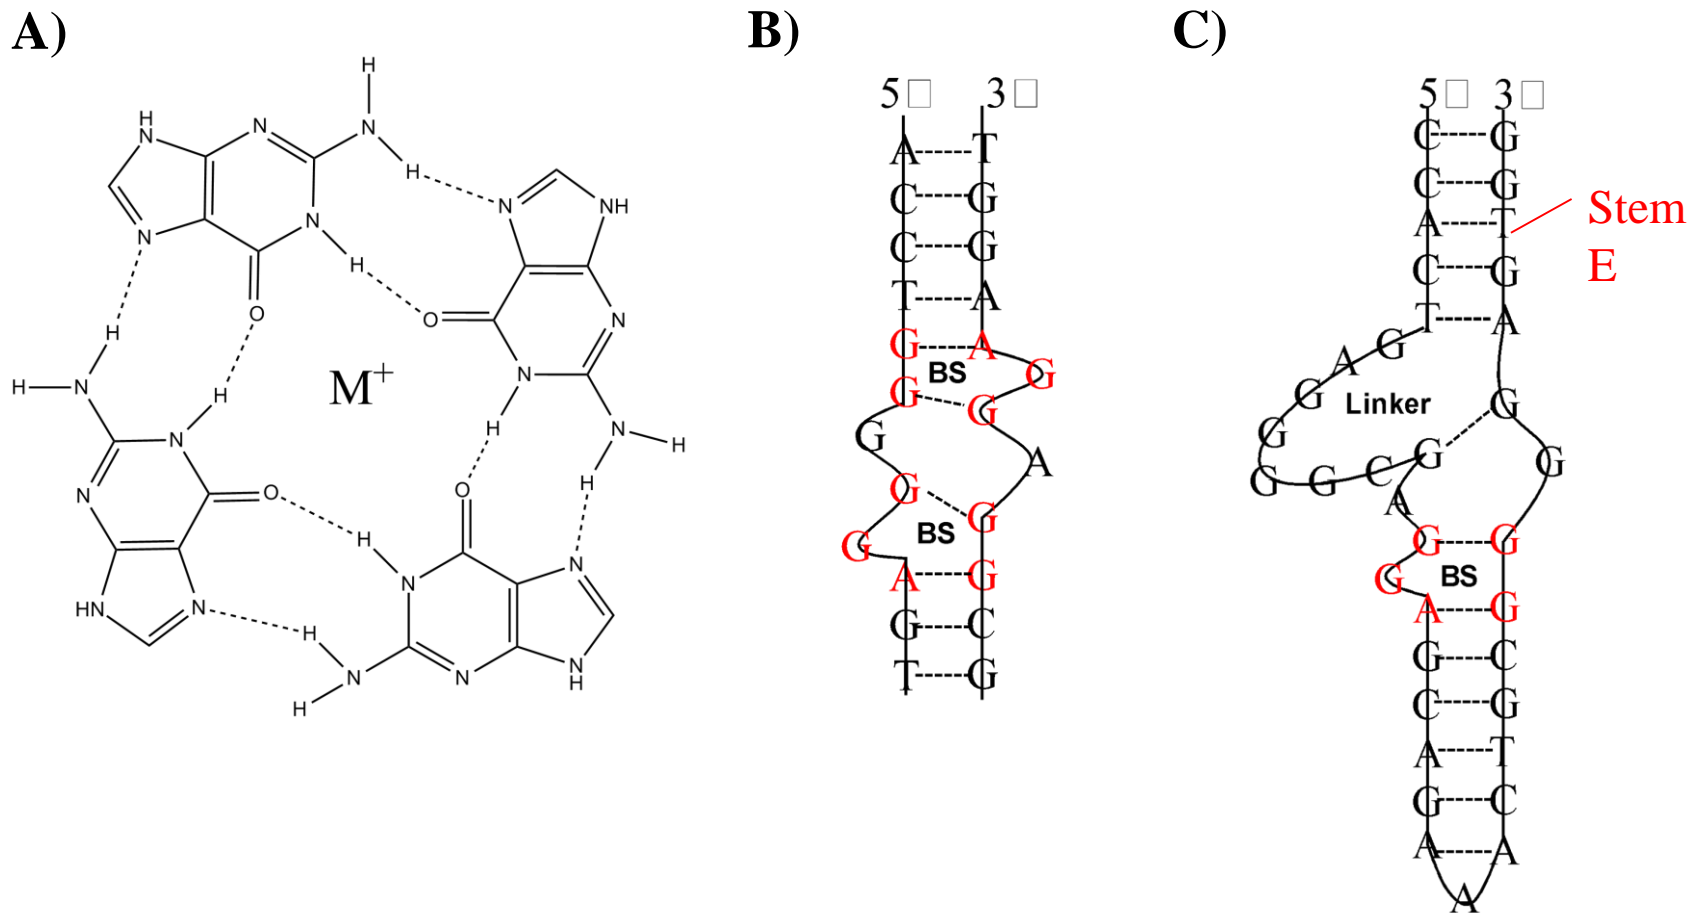

**SI Figure 2:** a) G-quadruplex base pairing stabilized by metal ions. b) Structure of ATP-binding aptamer as revealed by NMR, BS: binding site. c) Predicted structure of cAMP-specific adenosine-recognition DNA aptamer isolated by Barbu et al.

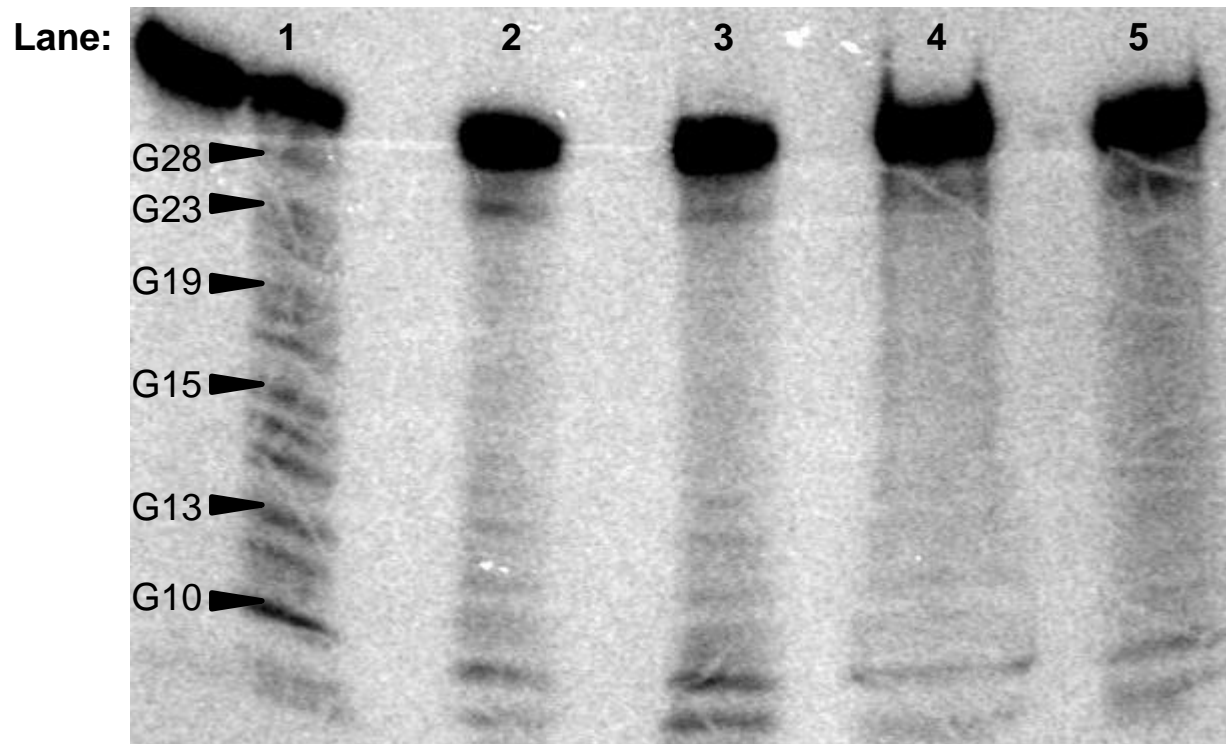

**SI Figure 3:** DMS-piperidine-cleavage-assay of caDNapt-1 in the presence of excess MgCl<sub>2</sub>. Products were electrophoresed after performing DMS-mediated methylation and cleavage of 5'-<sup>32</sup>P-caDNapt-1 in Tris.Cl (1 mM, pH 7.5, lane 1) or SBT with no additives (lane 2), with cAMP (10 mM, lane 3), with MgCl<sub>2</sub> (9 mM, lane 4), or with both additives followed. Note that G bases show protection from cleavage in the presence of cAMP and that the MgCl<sub>2</sub> necessary for conformation change (Figure 3a) does not interfere in the formation of G-quartet structure.

**A)**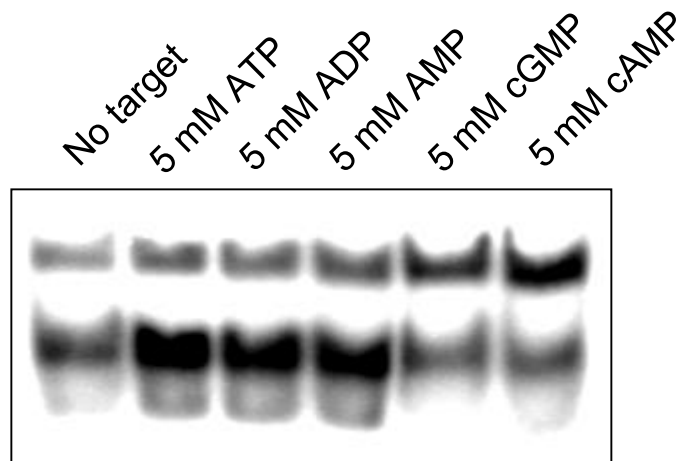**B)**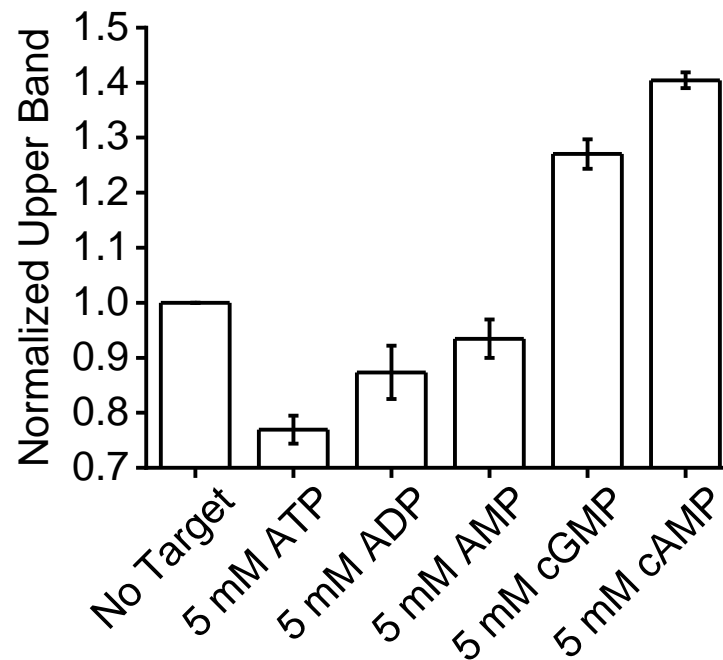

**SI Figure 4:** **a)** 12% Non denaturing gel electrophoresis using radiolabeled caDNapt-1 (1nM) and unlabeled caDNapt-1 (5 nM) incubated at 25 °C for 3 h in SBT containing 9 mM MgCl<sub>2</sub> in the presence of 5mM ATP/ADP/AMP/cGMP/cAMP as indicated. **b)** Quantification of gel shown in a. Bar graph showing the fraction of the slower band intensity, normalized to the fraction in absence of any of these molecules. Error bars: mean  $\pm$  s.e.m., n=3.
